# Supplementary material
Source: MDPI journal article supplement (https://www.mdpi.com/1996-1073/13/15/3867)
Supplement: s1 [file s1]

## Supporting Information

Article

# Photo-Rechargeable Electric Energy Storage Systems Based on Silicon Solar Cells and Supercapacitor-Engineering Concept

Ireneusz Plebankiewicz, Krzysztof Artur Bogdanowicz \* and Agnieszka Iwan \*

Military Institute of Engineer Technology, Obornicka 136 Str., 50-961 Wrocław, Poland; plebankiewicz@witi.wroc.pl (I.P.)

\* Correspondence: bogdanowicz@witi.wroc.pl ([K.A.B.](#)); iwan@witi.wroc.pl ([A.I.](#))

Received: 25 June 2020; Accepted: 24 July 2020; Published: 28 July 2020

**Table S1.** A summary of crucial parameters of supercapacitors used in energy storage system.

| Parameter                                    |          | Supercapacitor 1 | Supercapacitor 2 | Supercapacitor 3 |
|----------------------------------------------|----------|------------------|------------------|------------------|
| Brand Type                                   |          | Eaton series XB  | AXV Axial 850F   | Eaton series XV  |
| Symbol                                       |          | XB3560-2R5407-R  | SCCY1AB857SLBLE  | XV3560-2R7407-R  |
| dimensions                                   |          | 60mm × 35mm      | 115mm × 35mm     | 60mm × 35mm      |
| Capacity of single capacitor                 | $C_{sc}$ | 400F             | 850F             | 400F             |
| Operating potential of single supercapacitor | $V_{sc}$ | 2.5V             | 2.7V             | 2.7V             |
| Storied energy                               | $E_s$    | 0.35Wh           | 0.86Wh           | 0.41Wh           |
| Series resistance                            | $R_s$    | 4.5mΩ            | 1.3mΩ            | 3.2mΩ            |
| Current of loss                              | $I_u$    | 0.45mA           | 2.2mA            | 0.85mA           |

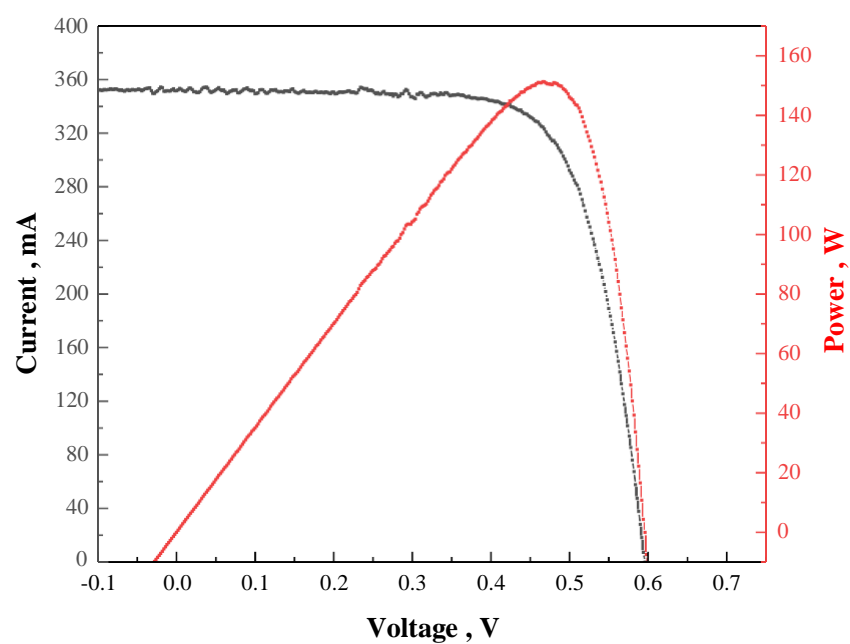

(a)

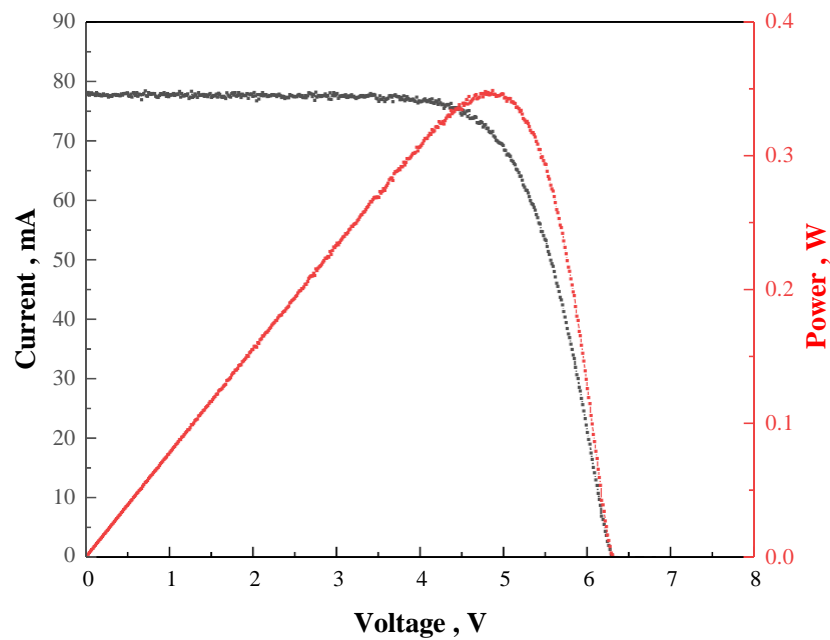

(b)

**Figure S1.** I-V characteristics of: (a) PV cell with size of 50 mm  $\times$  20 mm and (b) PV module with size of 65 mm  $\times$  65 mm.

(a)

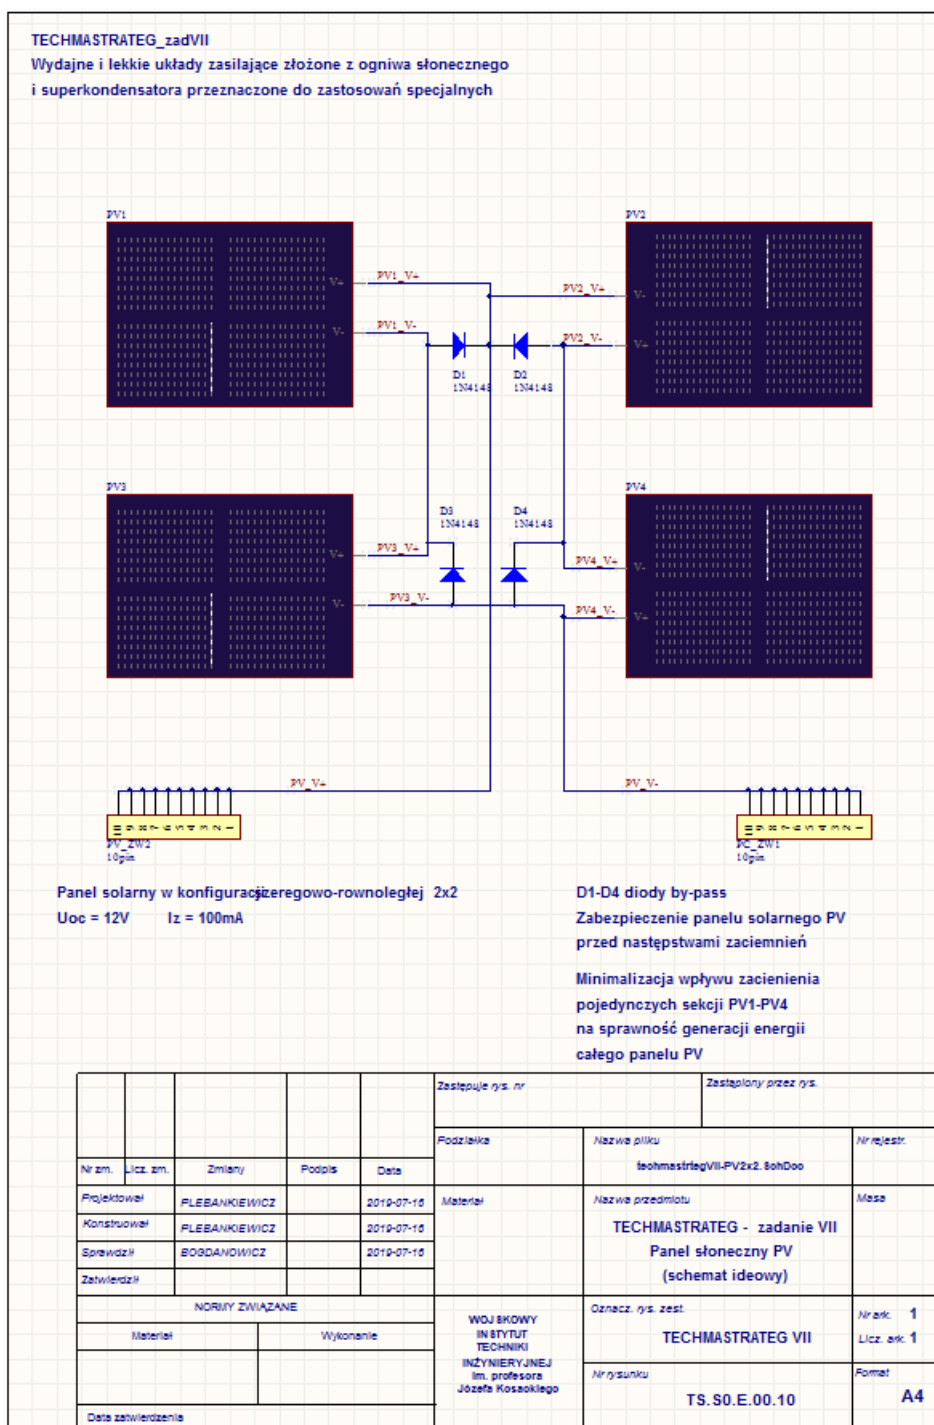

TECHMASTRATEG\_zadVII

Wydajne i lekkie układy zasilające złożone z ogniw słonecznych i superkondensatora przeznaczone do zastosowań specjalnych

Panel solarny w konfiguracji szeregowej 18x1  
 $U_{oc} = 8.4V$   $I_z = 20mA$

D1-D12 diody bypass  
 Zabezpieczenie panelu solarnego PV przed następstwami zacienienia  
 Minimalizacja wpływu zacienienia pojedynczych sekcji PV1-PV4 na sprawność generacji energii całego panelu PV

4

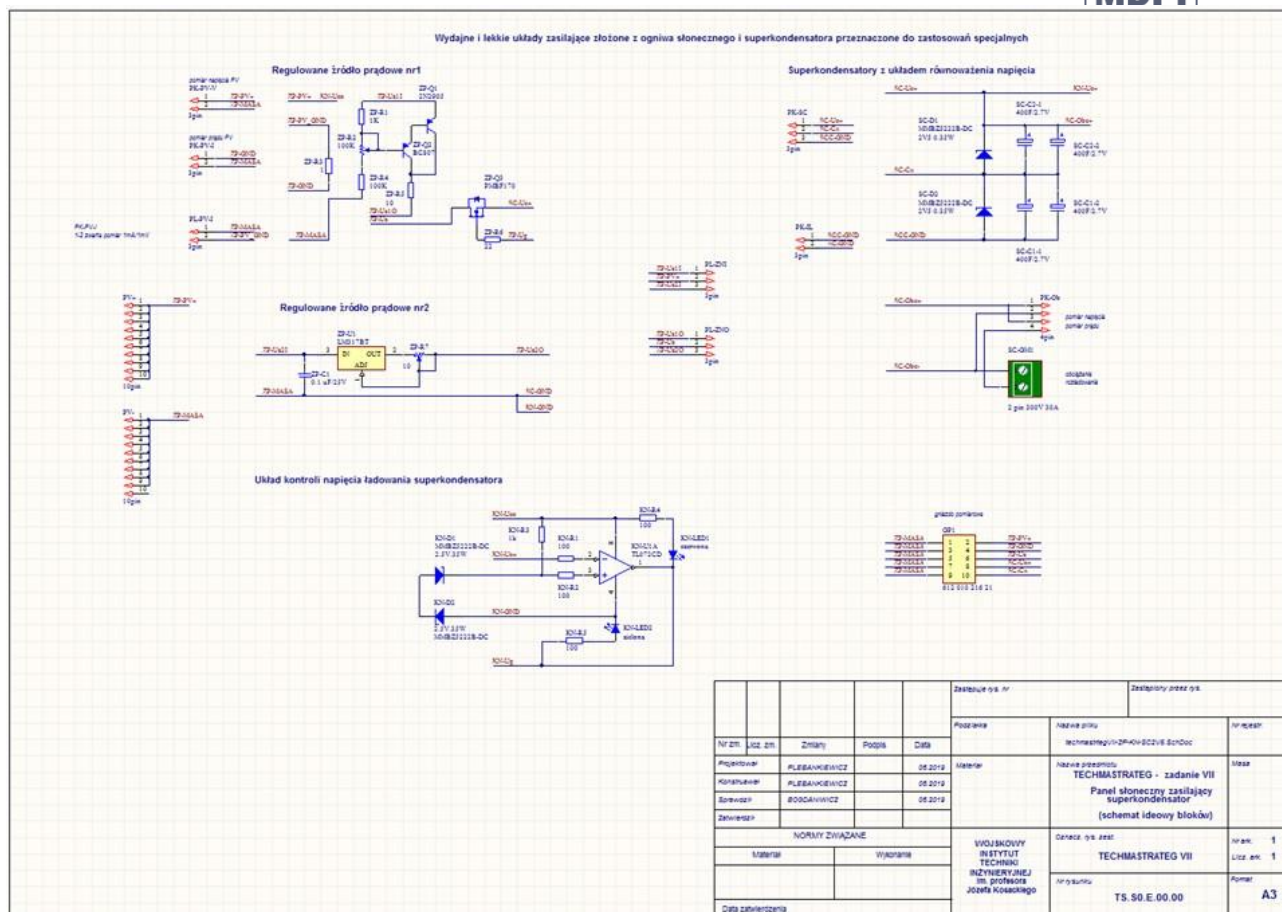

**Figure S3.** Schematic diagram of the power source block, voltage control system and supercapacitors.

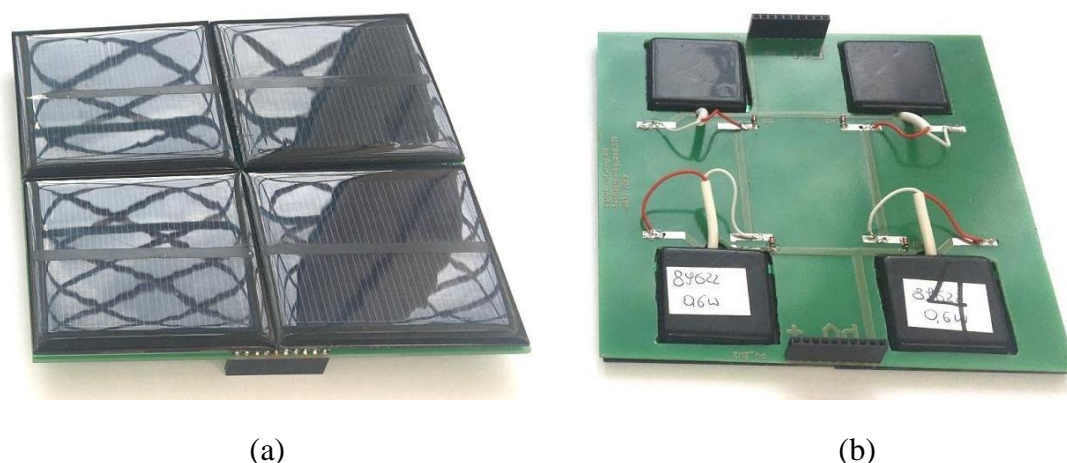

**Figure S4.** View of assembled PCB of first demonstrator- photovoltaic cells in a system of 40 cells connected in series in parallel in a  $2 \times 10 \times 2$  system: (a) page of elements; (b) print page.

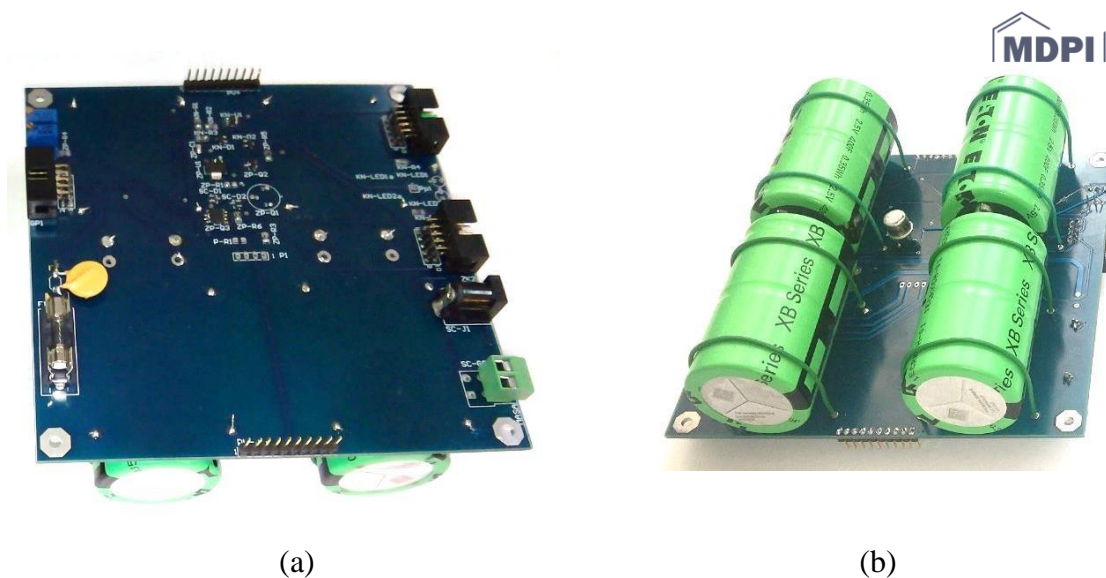

**Figure S5.** View of assembled elements: (a) a block of a power source, a voltage control system and (b) four supercapacitors with a capacity of  $C_{SC} = 400 \text{ F}$ , operating voltage  $V_{SC} = 2.5 \text{ V}$

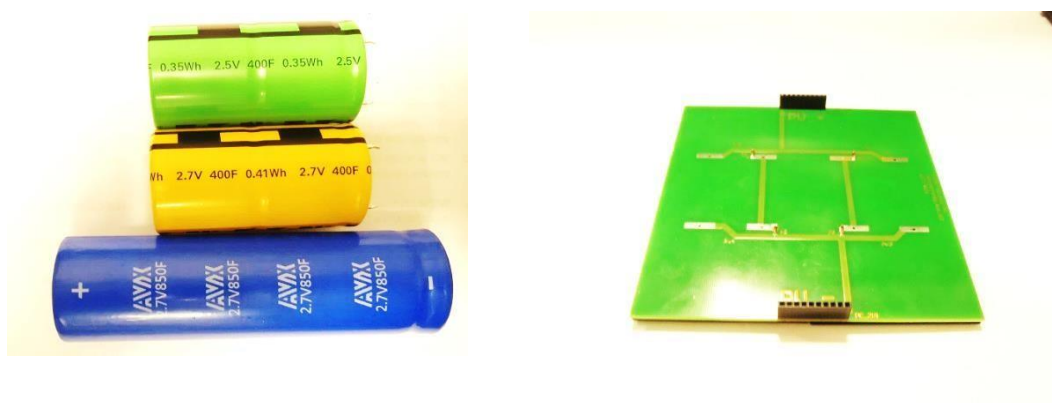

**Figure S6.** View of assembled PCB of second demonstrator - photovoltaic cells in a system of 40 cells connected in series in parallel in a  $2 \times 10 \times 2$  system: (a) page of elements; (b) print page



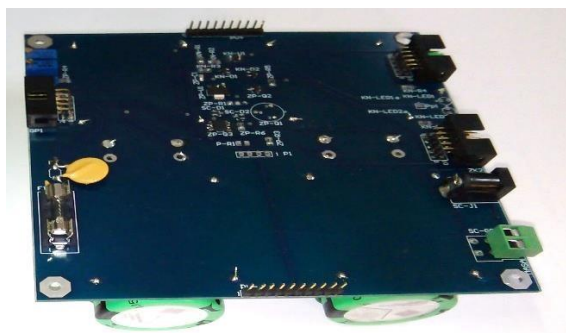

(a)

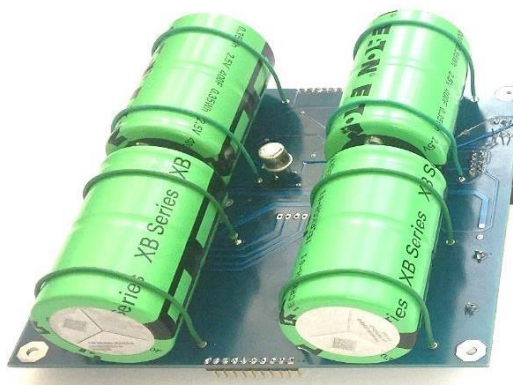

(b)

**Figure S7.** View of assembled PCB of second demonstrator: power source block, voltage control system and two supercapacitors with capacity  $C_{SC} = 850 \text{ F}$  and operating voltage  $V_{SC} = 2.7 \text{ V}$ ,

(a) page of elements; (b) print page

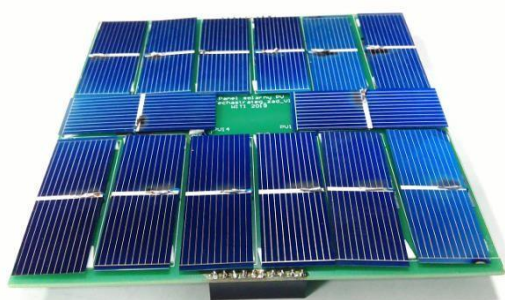

(a)

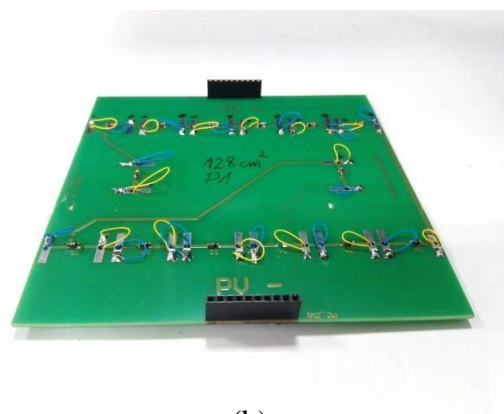

(b)

**Figure S8.** View of assembled PCB of third demonstrator - photovoltaic cells in a system of 14 cells connected in series in a  $14 \times 1$  system: (a) page of elements; (b) print page

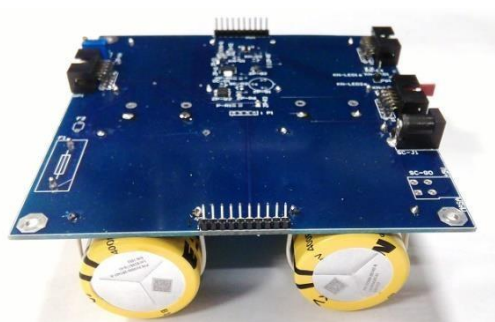

(a)

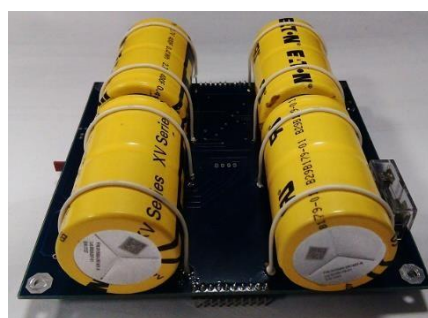

(b)

**Figure S9.** View of assembled PCB of third demonstrator - current source block, voltage control system and four supercapacitors with  $C_{SC} = 400$  F capacity and  $V_{SC} = 2.7$  V operating voltage: (a) page of elements; (b) print page



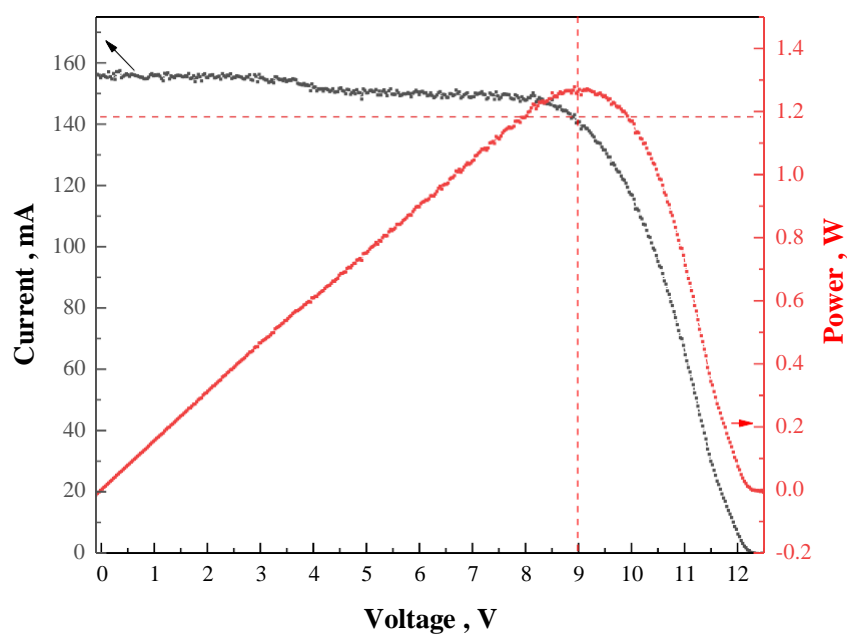

(a)

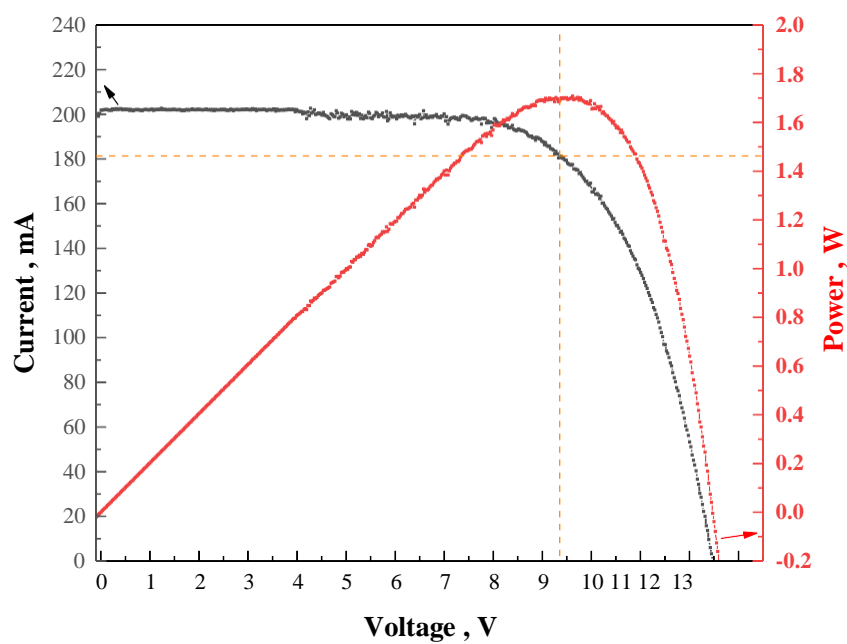

(b)

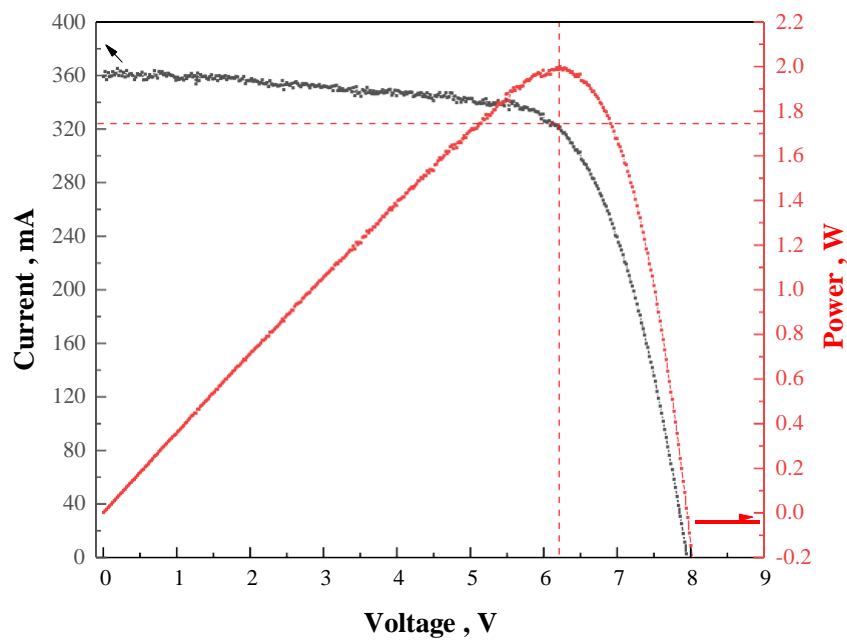

(c)

**Fig. S10.** Average voltage and current characteristics of a PV panel with the MPP optimal operating point marked at illumination  $\sim 990\text{W/m}^2$  and  $\sim 21\text{ }^\circ\text{C}$  for: (a) demonstrator no. 1 ( $V_{oc} = 12.45\text{ V}$ ,  $I_{sc} = 155.76\text{ mA}$ ,  $FF = 65\%$ ,  $PCE = 8.94\%$ ), (b) demonstrator no. 2 ( $V_{oc} = 12.34\text{ V}$ ,  $I_{sc} = 212.67\text{ mA}$ ,  $FF = 65\%$ ,  $PCE = 11.85\%$ ), (c) demonstrator no. 3 ( $V_{oc} = 7.95\text{ V}$ ,  $I_{sc} = 359.33\text{ mA}$ ,  $FF = 69\%$ ,  $PCE = 14.65\%$ ).
